# Supplementary material
Source: PubMed Central journal article supplement (PMC3959855)

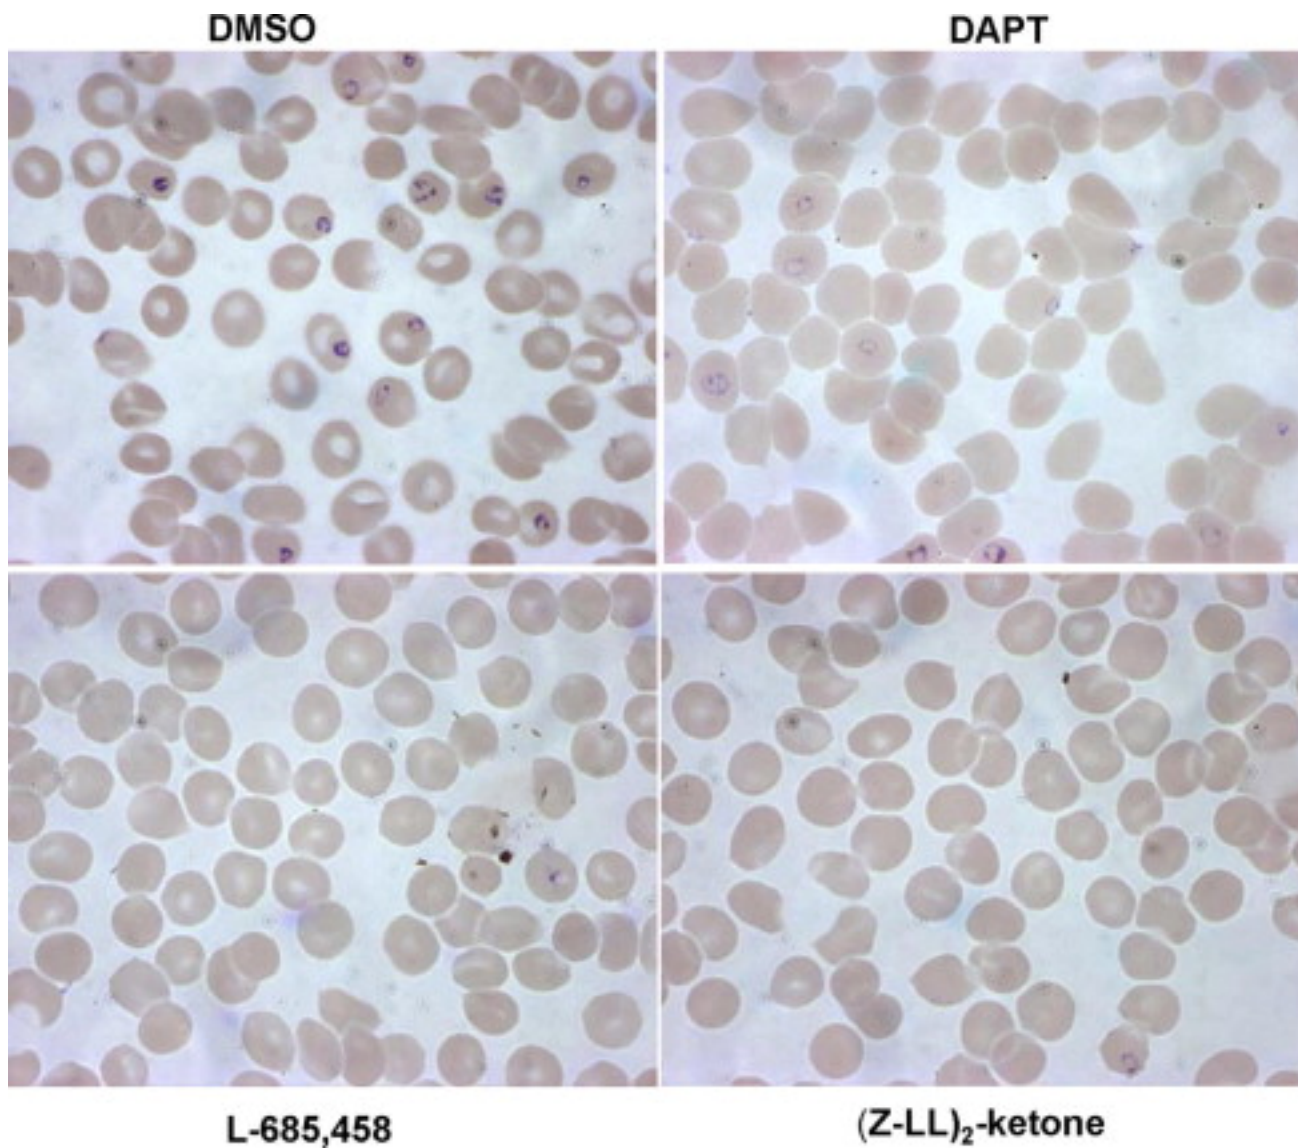

Supplementary Fig. 3.

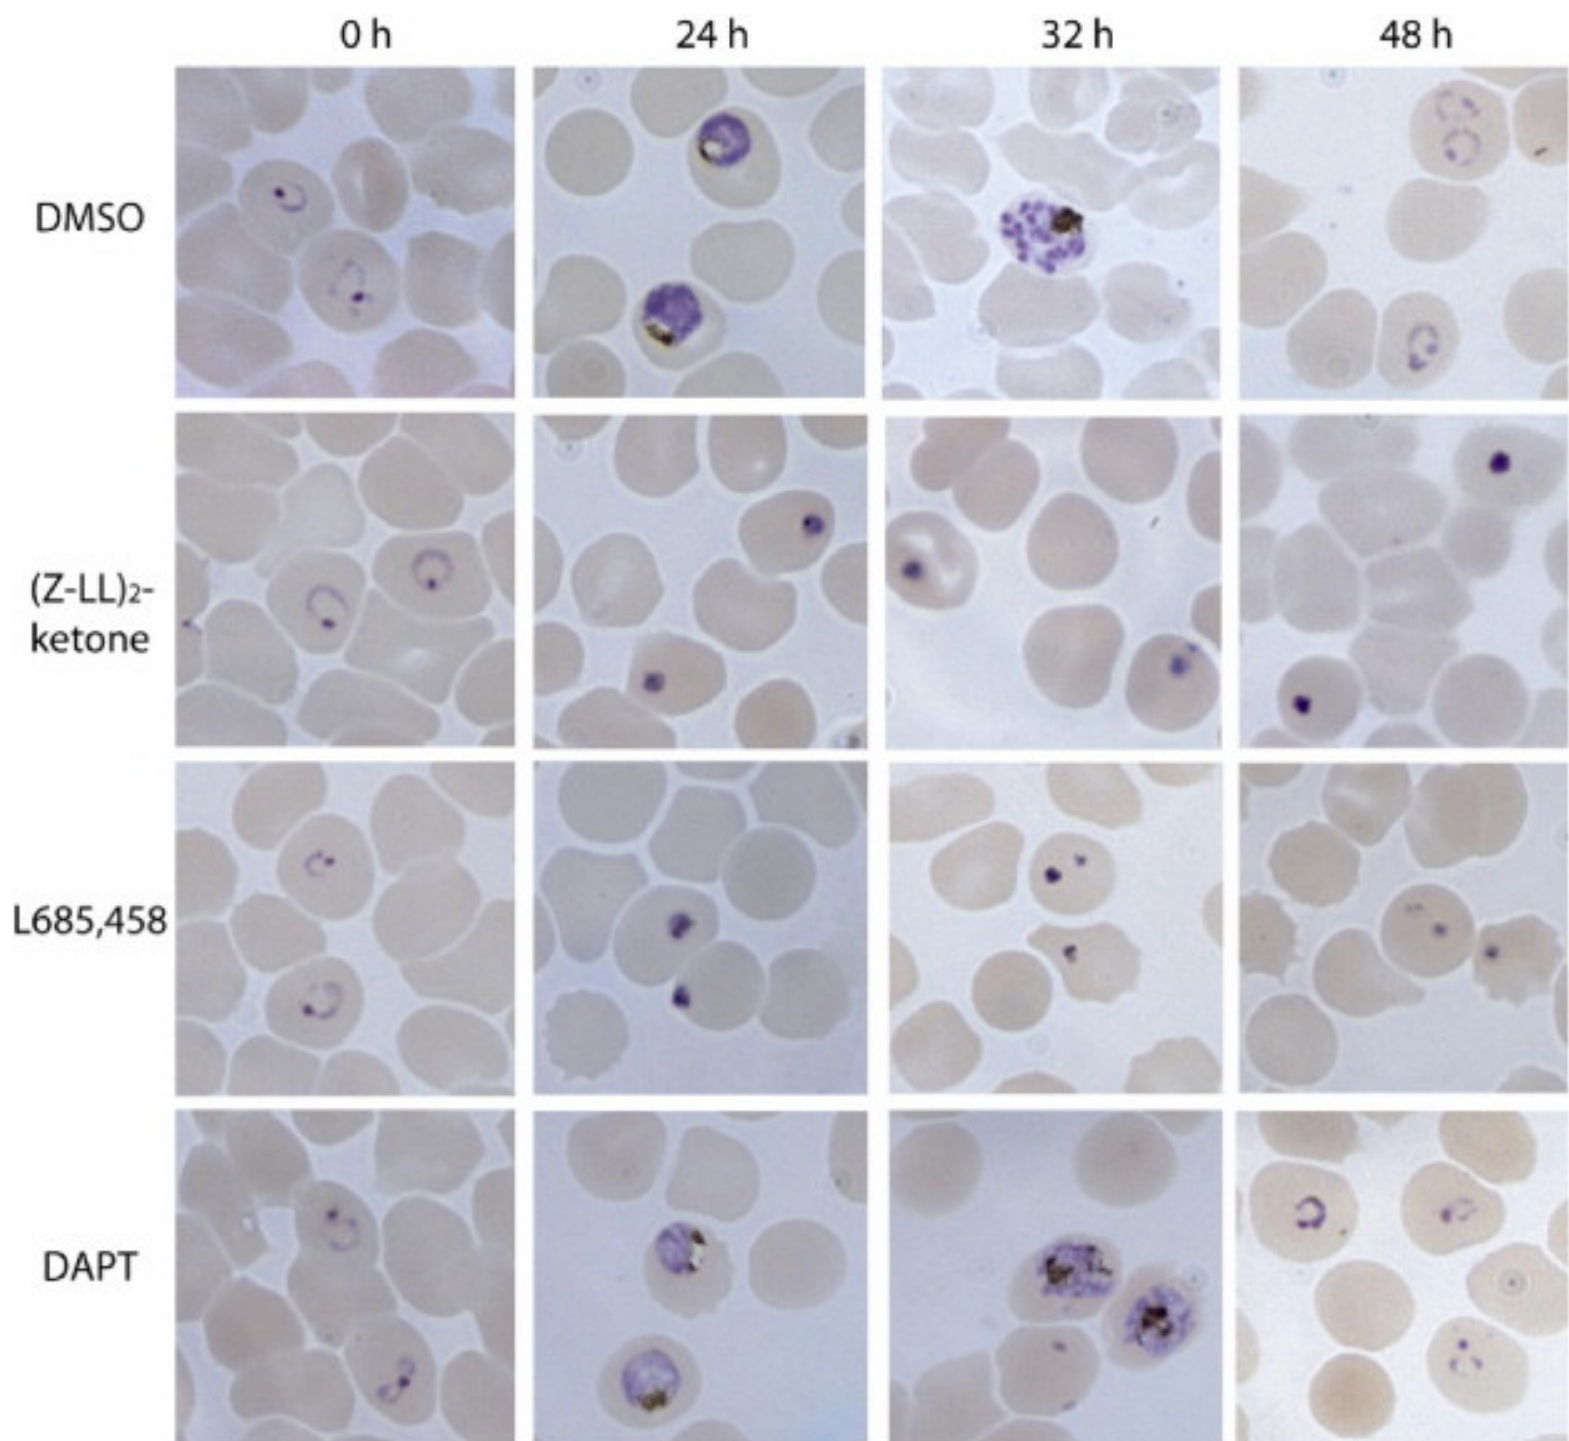

Supplementary Fig. 4.

Supplement: NIHMS563009-supplement-supplement_1.pdf [file NIHMS563009-supplement-supplement_1.pdf]
